# Supplementary figures and images for: The influence of nanostructure size on V2O5electrochemical properties as cathode materials for lithium ion batteries
Source: Royal Society of Chemistry journal article supplement (doi:10.1039/c6ra05695d), 2016-01-01

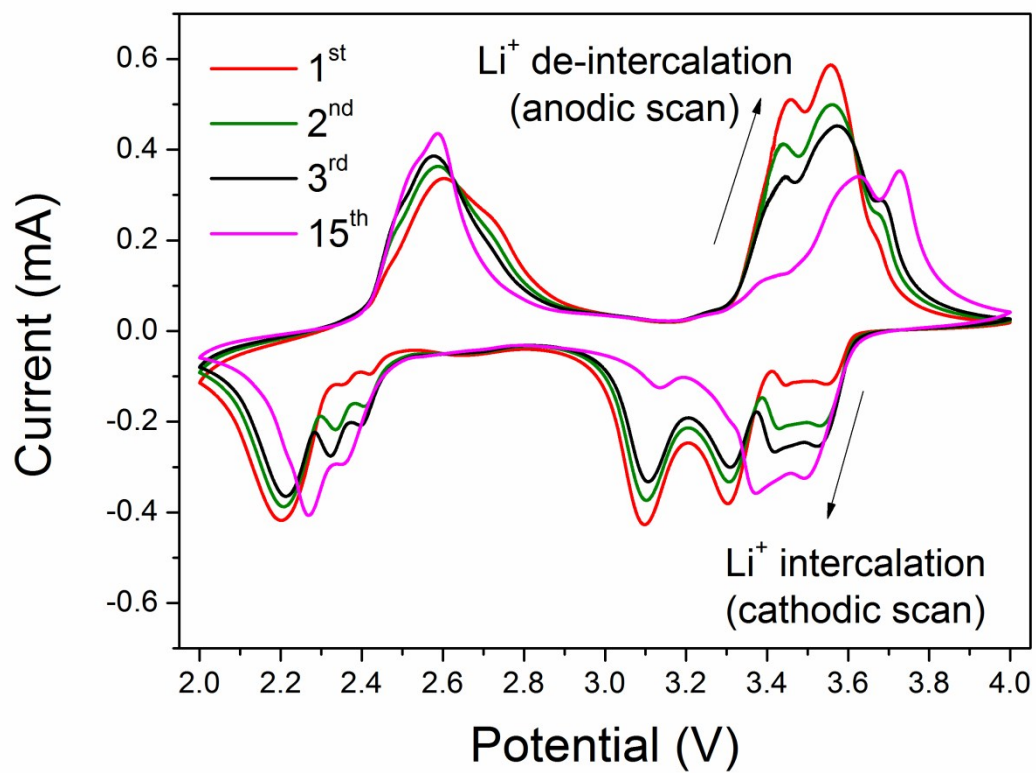

Fig S1

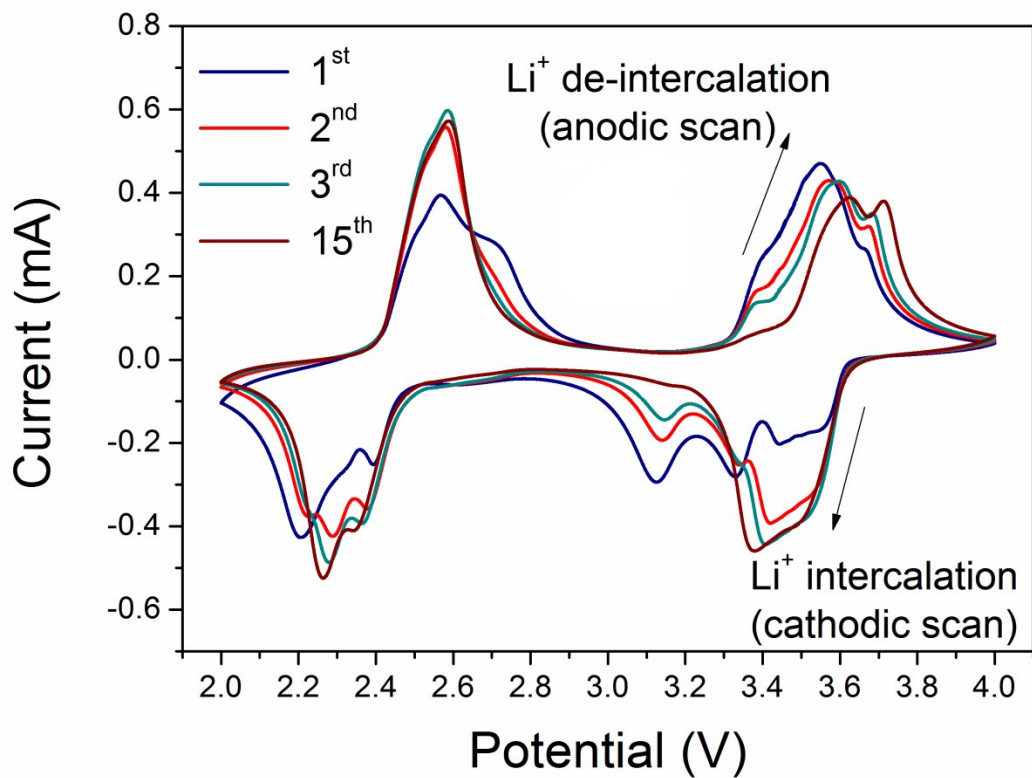

Fig S2

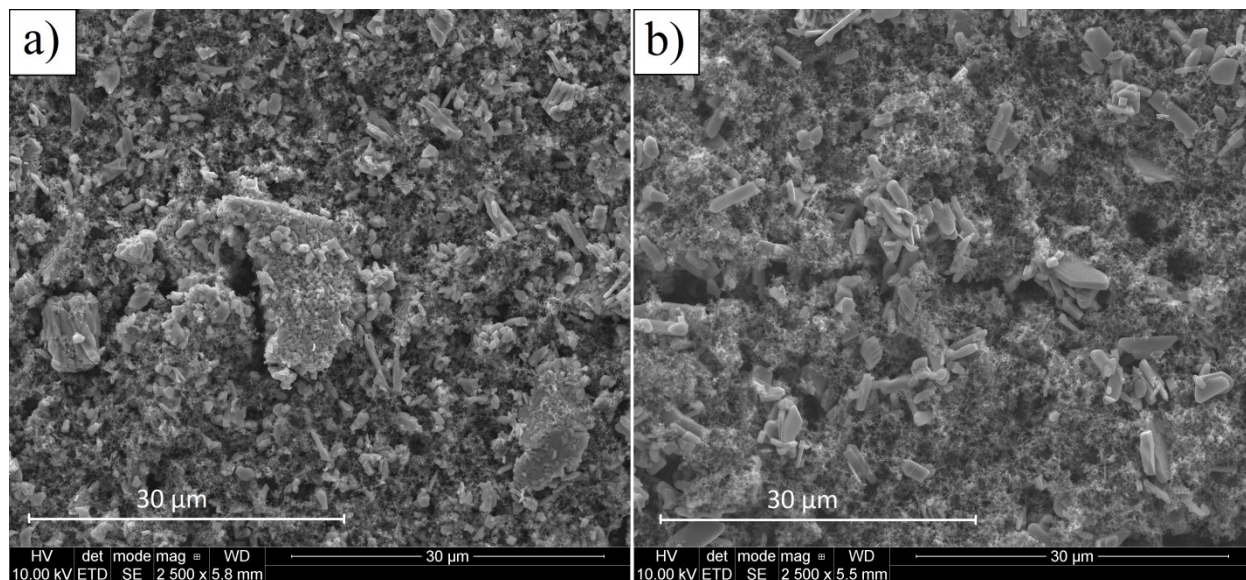

Fig S3

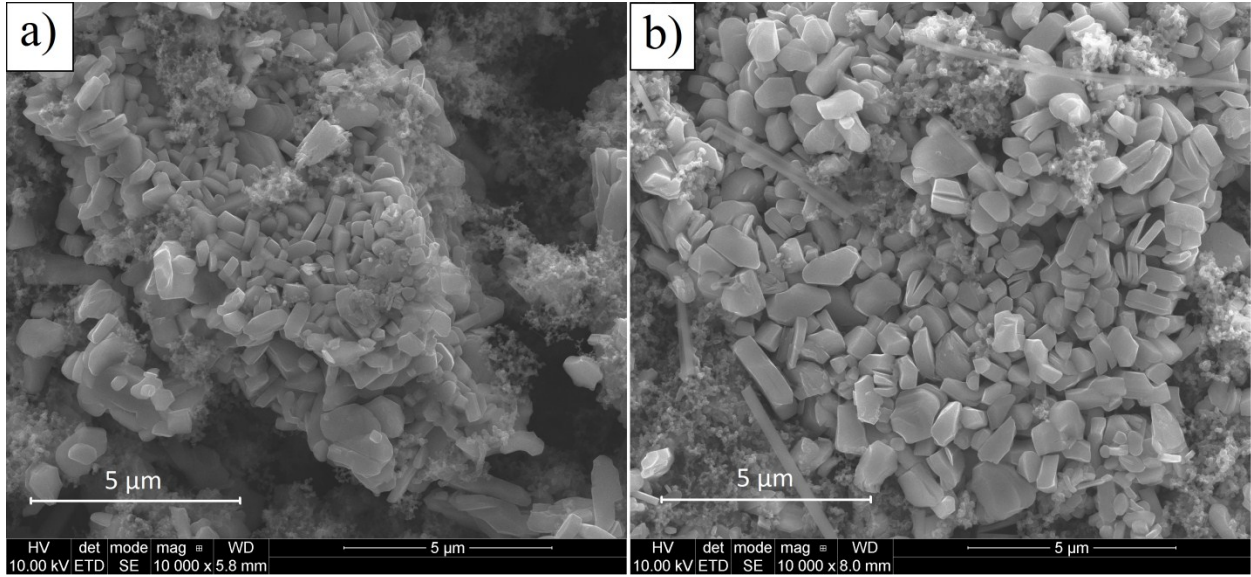

Fig S4

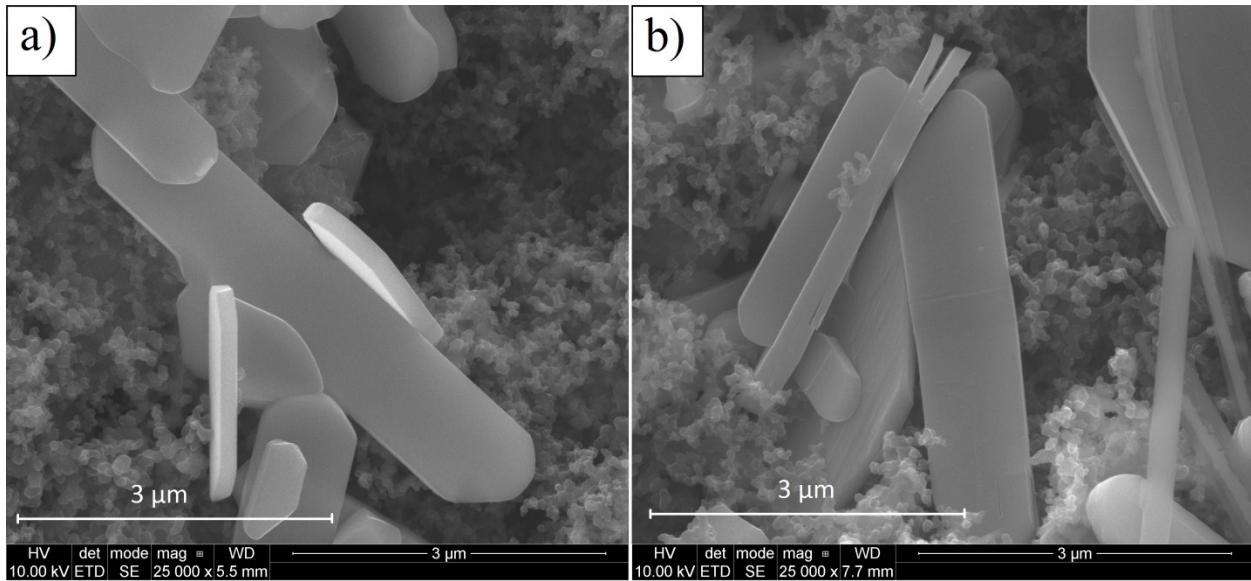

Fig S5

Supplement: c6ra05695d1.pdf [file c6ra05695d1.pdf]
